# Supplementary material for: MRI reveals menstrually-related muscle edema that negatively affects athletic agility in young women
Source: PLoS One. 2018 Jan 24;13(1):e0191022. doi: 10.1371/journal.pone.0191022 (PMC5783373; doi:10.1371/journal.pone.0191022)
Supplement: S2 Table — (XLSX) [file pone.0191022.s003.xlsx]

## Sheet: Sheet1
Table S2	The length of the cycle/luteal phase and measurement days in EL and LL phases in all subjects.
	ID	cycle (days)	days in the Luteal phase	EL	LL
				days from the detected LH surge	days prior to the next menses
	2	31	15	4	4
	3	35	12	3	6
	4	28	12	5	3
	5	31	13	6	3
	6	33	13	3	6
	7	33	14	5	5
	8	32	13	4	4
	9	34	12	4	2
	10	29	13	6	2
	11	32	16	4	5
	12	30	13	4	2
	13	34	16	7	2
	14	30	11	6	4
	15	31	12	5	3
